# Supplementary material for: Weakening of the tropical tropopause layer cold trap with global warming
Source: Copernicus journal article supplement (doi:10.5194/acp-23-7447-2023), 2023-07-06
Supplement: Supplementary file 1 [file acp-23-7447-2023-supplement.zip]

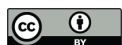

## *Supplement of*

# **Weakening of the tropical tropopause layer cold trap with global warming**

**Stephen Bourguet and Marianna Linz**

*Correspondence to:* Stephen Bourguet (stephen\_bourguet@g.harvard.edu)

- acp-23-7447-2023-supplement-title-page.pdf
- supplemental\_figs
  - .DS\_Store
  - FigS01.eps
  - FigS02.eps
  - FigS03.eps
  - FigS04.eps
  - FigS05.eps
  - FigS06.eps
  - FigS07.eps
  - FigS08.eps
  - FigS09.eps

The copyright of individual parts of the supplement might differ from the article licence.
